# Supplementary material for: The role of G-density in switch region repeats for immunoglobulin class switch recombination
Source: PubMed Central journal article supplement (PMC4245955; doi:10.1093/nar/gku1100), 2014-11-06
Supplement: supp_gku1100_nar-02858-v-2014-File003.pdf [file supp_gku1100_nar-02858-v-2014-File003.pdf]

**Table S1. Construction Oligonucleotides and Sequences.**

|    | <b>Sequence</b>                                                                                                                                                    | <b>Function</b>                                             |
|----|--------------------------------------------------------------------------------------------------------------------------------------------------------------------|-------------------------------------------------------------|
| 1  | TGGGGTCGGGCCTCGAGGGGAATTCTAGGGTACCATGGGA                                                                                                                           | RIZ with 5 G-clusters                                       |
| 2  | GATCTCCCATGGTACCCTAGAATTCCCCTCGAGGCCCGACCCCATGCA                                                                                                                   | complementary to 1                                          |
| 3  | ATCGAGTGAGTGTGTGAGCTGAGTGTGTGAGAGCTGTGAGTGAGAGTGA<br>GAGCTGTGAGAGTGAGAGCTGAGTGAGAGTG                                                                               | one REZ repeat unit with 4 AGCT sites<br>(high G-density)   |
| 4  | CTCGATCACTCTCACTCAGCTCTCACTCTCACAGCTCTCACTCTCACTCA<br>CAGCTCTCACACACTCAGCTCACACACTCA                                                                               | complementary to 3                                          |
| 5  | ATCGAATGAGTATGTGAGCTTAGTGTATGAAAGCTGTTAGTGAAAGTGATA<br>GCTGTAAGAGTTAGAGCTAAGTGATAGTT                                                                               | one REZ repeat unit with 4 AGCT sites<br>(low G-density)    |
| 6  | TTCGATAACTATCACTTAGCTCTAACTCTTACAGCTATCACTTTCACTAACA<br>GCTTTCATACACTAAGCTCACATACTCA                                                                               | complementary to 5                                          |
| 7  | GATCTTATAGAATATTATGTATTTAAAGTTCATAGTATTTTCAGATCTATTATGTA<br>G                                                                                                      | insert 50bp AT-rich sequence between<br>the RIZ and the REZ |
| 8  | TCGACTACATAATAGATCTGAAATACTATGAACTTTAAATACATAATATTCTAT<br>AA                                                                                                       | complementary to 7                                          |
| 9  | GATCTTTCGAAGTCGTCATGTCAGTCTGAGAAGTTCAGTCGAGTCGTCAG<br>ATCGTG                                                                                                       | insert 50bp random sequence<br>between the RIZ and the REZ  |
| 10 | TCGACACGATCTGACGACTCGACTGAACTTCTCAGACTGACATGACGACT<br>TCGAAA                                                                                                       | complementary to 9                                          |
| 11 | GGCAGGAGATCTAACTCTTTGTCCAATCTCTCTTTTC                                                                                                                              | PCR primer to amplify the 150 bp<br>insertion               |
| 12 | GCCACTAGTGTCGACAGTGAGTTTTTGTAGAAAAGAGAA                                                                                                                            | Paired with 11                                              |
| 13 | TATGTATAGAATATTATGTATTTAAAGTTCATAGTATTTTCAGATCTATTATGTAA<br>CTAGTTACATAATAGATCTGAAATACTATGAACTTTAAATACATAATATTCTAT<br>ACA                                          | insert 50bp AT-rich sequence<br>upstream of the RIZ         |
| 14 | CTAGTTACATAATAGATCTGAAATACTATGAACTTTAAATACATAATATTCTAT<br>ACA                                                                                                      | complementary to 13                                         |
| 15 | TATGTTTGAAGTCGTCATGTCAGTCTGAGAAGTTCAGTCGAGTCGTCAGA<br>TCGTA                                                                                                        | insert 50bp random sequence<br>upstream of the RIZ          |
| 16 | CTAGTACGATCTGACGACTCGACTGAACTTCTCAGACTGACATGACGACT<br>TCGAACA                                                                                                      | complementary to 15                                         |
| 17 | AGATCTAACTCTTTGTCCAATCTCTTTTCCACTCCACAATTCTGCTCTGAA<br>TACTTTGAGCAAACCTCAGCCACAGGTCTGTACCAAATTAACATAAGAAGCA<br>AAGCAATGCCACTTTGAATTATTCTTTTTCTAACAAAACTCACTGTTCGAC | PCR product of 11 and 12                                    |

**Table S2. PCR Primers for Diagnosis and Bisulfite Sequencing Oligonucleotides.**

|       | <b>Sequence</b>               | <b>Function</b>                                                                                |
|-------|-------------------------------|------------------------------------------------------------------------------------------------|
| ZZ46  | TCACCCAGTCCTAAGCTCTCTACC      | forward primer in the I $\alpha$                                                               |
| ZZ49  | GTAGTCTTCACACTGCCCATCTCG      | reverse primer near the first C $\alpha$                                                       |
| ZZ103 | CACTCGATATCGTCGACAGATCTCC     | diagnose the insertion of DNA with (5/6 or 7/8 +)1/2 + 3/4, paired with ZZ46                   |
| ZZ104 | GTGATCGAGATCGGATCCATCGAT      | diagnose the insertion of DNA with (5/6 or 7/8 +)1/2 + (9/10 or 11/12 +) 3/4, paired with ZZ49 |
| ZZ463 | GATCTCCCATGGTACCCTAGAATTCC    | diagnose the insertion of DNA with 1/2 + 9/10 or 11/12 + 3/4, paired with ZZ46                 |
| ZZ455 | GTCGACAGATCTCCCATGGTACC       | diagnose the insertion of DNA with 1/2 + 13/14, paired with ZZ46                               |
| ZZ457 | AGCTAAGTGATAGTTAATCGGATCCATCG | diagnose the insertion of DNA with 1/2 + 13/14, paired with ZZ49                               |
| ZZ465 | GGGTTTTGAGGGGAATTTTAGGGTATT   | forward converted primer for bisulfite sequencing                                              |
| ZZ471 | CTCGATCTAGAGAACCCCTTCATCG     | reverse native primer for bisulfite sequencing                                                 |

**Table S3. qPCR Primers and Probes**

|                           | Sequence                                        | Function                                 |
|---------------------------|-------------------------------------------------|------------------------------------------|
| <b>S9.6 ChIP</b>          |                                                 |                                          |
| ZZ304                     | [6-FAM]CCCAGTGATAATCGGCTGCCTGATTC[BHQ1a-6FAM]   | probe for the Sa region                  |
| ZZ305                     | CCCACGAGCTCTGTCAAGTG                            | forward primer for the Sa region         |
| ZZ306                     | GCCGGAAGGGAAGTAATCG                             | reverse primer for the Sa region         |
| <b>GLT Quantification</b> |                                                 |                                          |
| ZZ274                     | CCTATGAAGGACACTCAACAACATTG                      | forward for the $\alpha$ region          |
| ZZ275                     | CCGATTATCACTGGGTCACCTTG                         | reverse primer for the $\alpha$ region   |
| ZZ276                     | [6-FAM]ATCTACCCACTGACACTCCCACGAGCTC[BHQ1a-6FAM] | probe for the $\alpha$ region            |
| ZZ277                     | TGCTCCCCGGGCTGTATT                              | forward primer for $\beta$ -actin region |
| ZZ278                     | ACATAGGAGTCCTTCTGACCCATT                        | reverse primer for $\beta$ -actin region |
| ZZ279                     | [6-FAM]ATCGTGGGCCGCCCTAGGCAC[BHQ1a-6FAM]        | probe for the $\beta$ -actin region      |
